# Supplementary material for: Kinetics of HIV-1 capsid uncoating revealed by single-molecule analysis
Source: eLife. 2018 Jun 7;7:e34772. doi: 10.7554/eLife.34772 (PMC6039174; doi:10.7554/eLife.34772)
Supplement: Figure 2—source data 1. [file elife-34772-fig2-data1.xlsx]

## Sheet: Sheet1
			opening		closed
Binder	Concentration	CA	fraction	Half-life (min)	fraction
none		wt	0.56	7.35545	0.44
CypA	1 μM	wt	0.47	5.75253	0.53
CypA	20 μM	wt	0.59	15.0388	0.41
PF74	10 μM	wt	0.73	0.677518	0.27
BI2	50 μM	wt	0.71	1.76897	0.29
none		E45A	0.87	37.0517	0.13
