# Supplementary material for: Kinetics of HIV-1 capsid uncoating revealed by single-molecule analysis
Source: eLife. 2018 Jun 7;7:e34772. doi: 10.7554/eLife.34772 (PMC6039174; doi:10.7554/eLife.34772)
Supplement: Figure 2—source data 2. [file elife-34772-fig2-data2.xlsx]

## Sheet: Sheet1
			opening, fast		opening, slow		closed
Binder	Concentration	CA	fraction	Half-life (min)	fraction	Half-life (min)	fraction
none		wt	0.11	0.467496	0.51	8.10536	0.38
CypA	1 μM	wt	0.15	0.465079	0.4	6.89803	0.45
CypA	20 μM	wt	0.15	0.906142	0.6	21.8026	0.25
PF74	10 μM	wt	0.62	0.48686	0.24	4.85867	0.15
BI2	50 μM	wt	0.49	0.765622	0.34	6.46389	0.17
none		E45A	0.04	0.593366	0.83	37.1412	0.12
