# Supplementary material for: Kinetics of HIV-1 capsid uncoating revealed by single-molecule analysis
Source: eLife. 2018 Jun 7;7:e34772. doi: 10.7554/eLife.34772 (PMC6039174; doi:10.7554/eLife.34772)
Supplement: Figure 6—source data 1. [file elife-34772-fig6-data1.xlsx]

## Sheet: Sheet1
			opening		closed
Binder	Concentration	CA	fraction	Half-life (min)	fraction
HeLa lysate	1 mg/mL	wt	0.61	29.3586	0.39
